# Supplementary material for: Nickel iron phosphide ultrathin nanosheets anchored on nitrogen-doped carbon nanoflake arrays as a bifunctional catalyst for efficient overall water splitting
Source: Royal Society of Chemistry journal article supplement (doi:10.1039/c9nr10471b), 2020-01-01
Supplement: c9nr10471b1.pdf [file c9nr10471b1.pdf]

### Supplementary Information

#### Nickel iron phosphide ultrathin nanosheets anchored on nitrogen-doped carbon nanoflake arrays as bifunctional catalyst for efficient overall water splitting

Jialin Bian<sup>1+</sup>, Zeyi Song<sup>1+</sup>, Xianglin Li<sup>2,3</sup>, Yuzhong Zhang<sup>1\*</sup>, Chuanwei Cheng<sup>1,2\*</sup>

<sup>1</sup>Shanghai Key Laboratory of Special Artificial Microstructure Materials and Technology, School of Physics Science and Engineering, Tongji University, Shanghai 200092, P. R. China.

<sup>2</sup>Hunan First Normal University, Changsha, Hunan, 410205, P. R. China.

<sup>3</sup>Dongguan NanoFrontier Microelectronics Equipment Co., Ltd, Dongguan, Guangdong, 523808 P. R. China

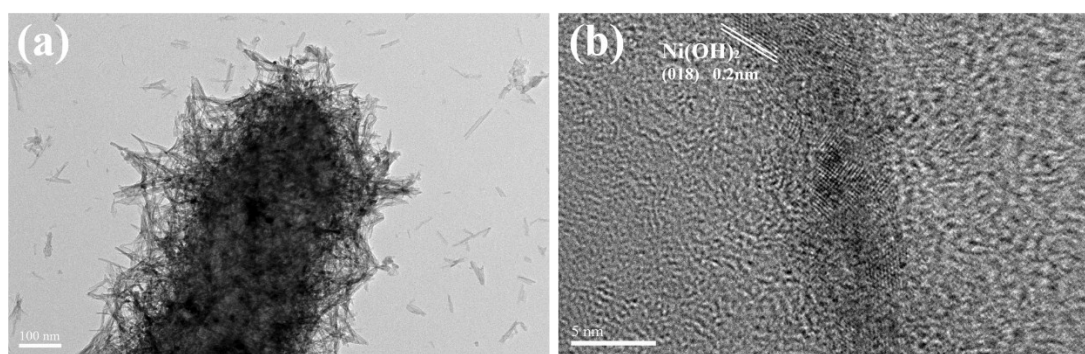

**Figure S1.** (a) TEM image and (b) HR-resolution image of the CC-NC-NiFe LDH.

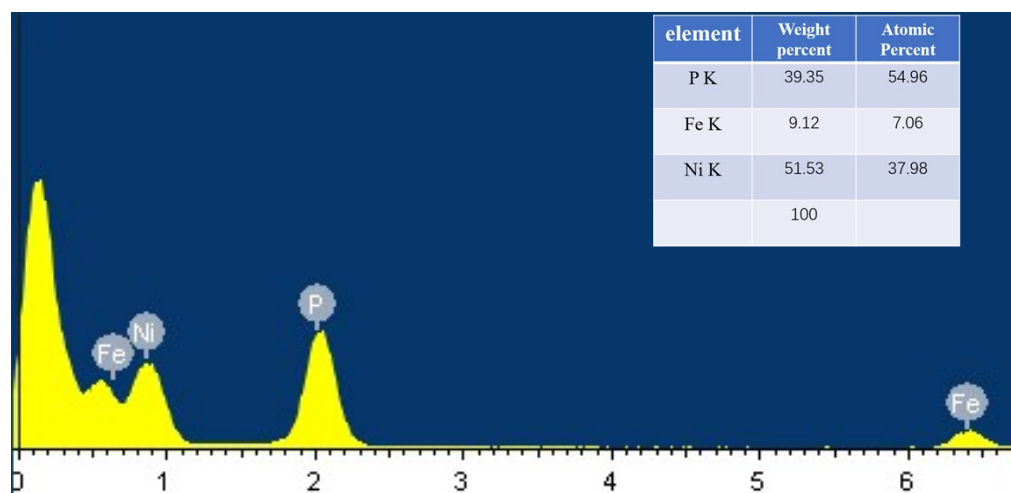

**Figure S2.** The EDX spectra f CC-NC-NiFeP

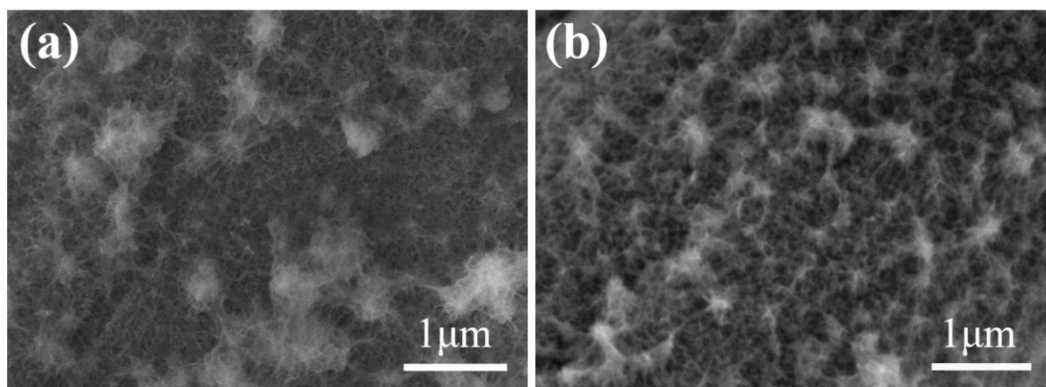

**Figure S3.** (a) SEM image of the CC-NiFe LDH. (b) SEM images of the CC-NiFeP

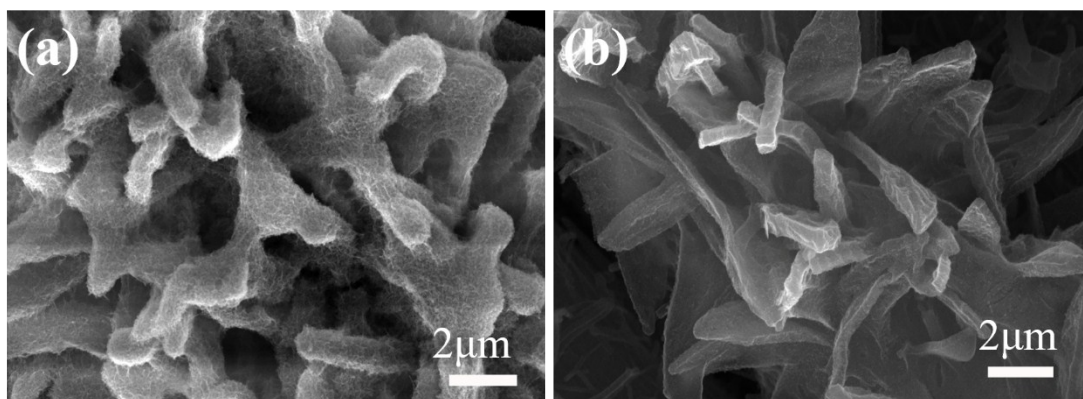

**Figure S4.** (a) SEM image of the CC-NC-Ni<sub>2</sub>P. (b) SEM images of the CC-NC-Fe<sub>2</sub>P

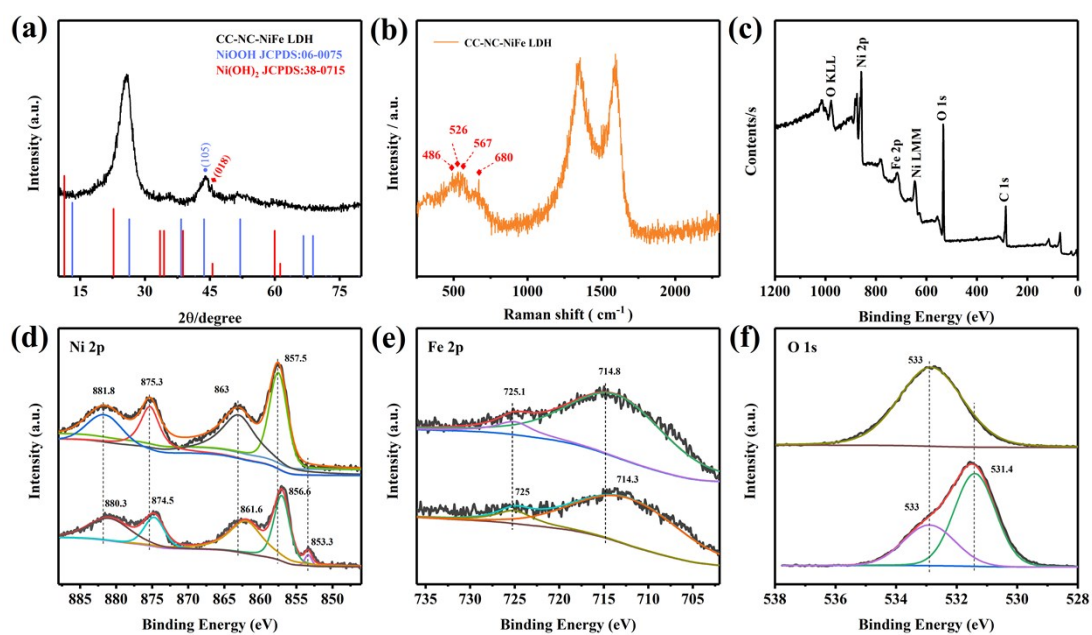

**Figure S5.** (a) XRD of CC-NC-NiFe LDH (b) Raman spectra of CC-NC-NiFe LDH. (c) overall XPS spectra of CC-NC-NiFe LDH (d-f) high-resolution scans of Ni 2p, Fe 2p and N 1s spectra of CC-NC-NiFe LDH and CC-NC-NiFeP

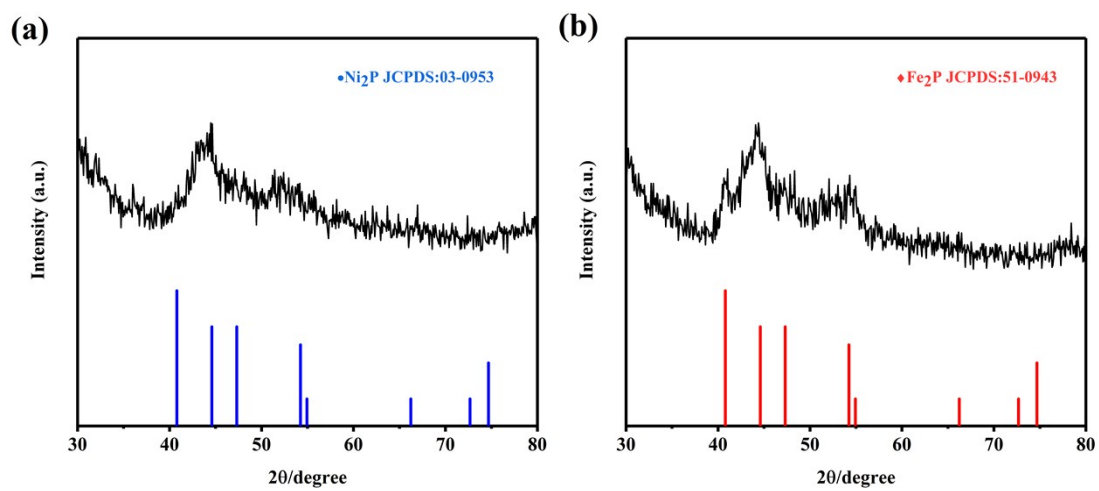

**Figure S6.** (a-b)XRD of CC-NC-Ni<sub>2</sub>P and CC-NC-Fe<sub>2</sub>P

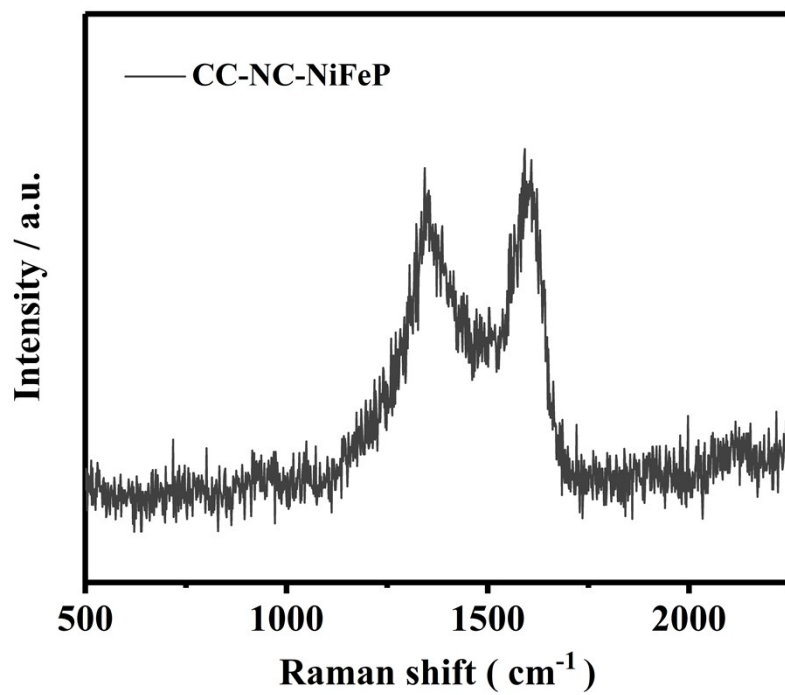

**Figure S7.** Raman spectrum of CC-NC-NiFeP.

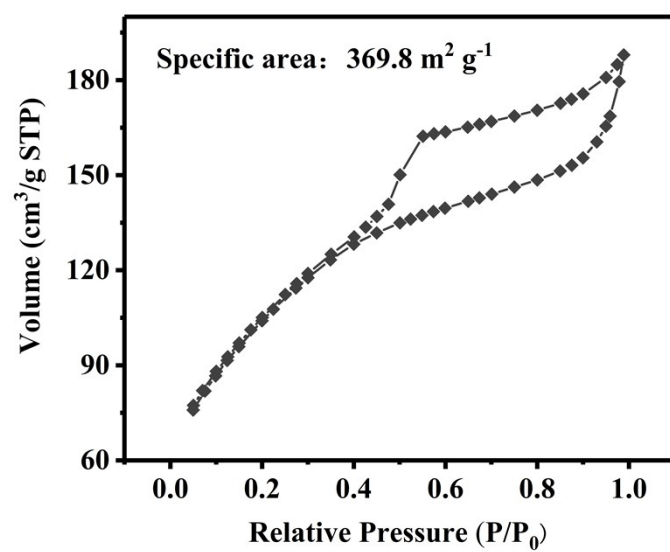

Figure S8. N<sub>2</sub> adsorption and desorption isotherms of MOF-derived carbon nanoflakes powders.



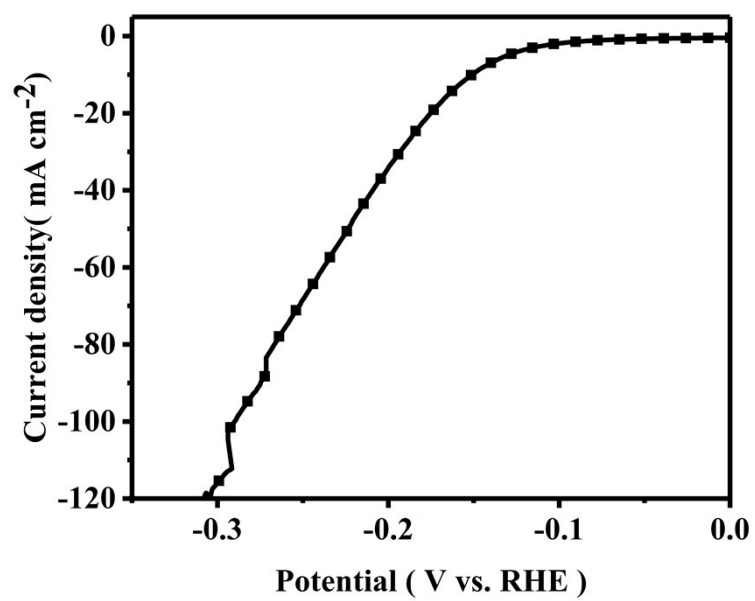

**Figure S9.** HER polarization curves of CC-NC-NiFeP in 0.5 M H<sub>2</sub>SO<sub>4</sub>.

Table S1 A compaprison of the HER performance of CC-NC-NiFeP in 1M KOH with non-precious metal catalyst in recent reports

| Catalyst                                                            | $\eta$ (mV) at<br>$J = 10 \text{ mA cm}^{-2}$ | Tafel solpe<br>( mV dec <sup>-1</sup> ) | Loading<br>(mg cm <sup>-2</sup> ) | Reference        |
|---------------------------------------------------------------------|-----------------------------------------------|-----------------------------------------|-----------------------------------|------------------|
| <b>CC-NC-NiFeP</b>                                                  | <b>94</b>                                     | <b>70</b>                               | <b>2.67</b>                       | <b>This work</b> |
| Ni/Mo <sub>2</sub> C <sub>(1.2)</sub> -NCNFs                        | 143                                           | 57.8                                    | 1.4                               | R1               |
| Ni <sub>3</sub> ZnC <sub>0.7</sub> /NCNT-70                         | 203                                           | 91                                      | 0.8                               | R2               |
| NiCo <sub>2</sub> S <sub>4</sub> & NiCo <sub>2</sub> S <sub>4</sub> | 183                                           | 89.8                                    | 1.5                               | R3               |
| NiCo <sub>2</sub> S <sub>4</sub> /NF                                | 80                                            | 58.5                                    | -                                 | R4               |
| NiFeP/SG                                                            | 125                                           | 47                                      | 2.07                              | R12              |
| Co <sub>0.6</sub> Fe <sub>0.4</sub> P-1.125                         | 133                                           | 61                                      | -                                 | R7               |
| Ni <sub>3</sub> S <sub>2</sub> @MoS <sub>2</sub> /FeOO <sub>2</sub> | 95                                            | 88                                      | -                                 | R8               |
| Fe-Co-P/NF                                                          | 163                                           | 106.1                                   | -                                 | R9               |
| NiFe LDH@NiCoP/                                                     | 120                                           | 88.2                                    | -                                 | R11              |

\

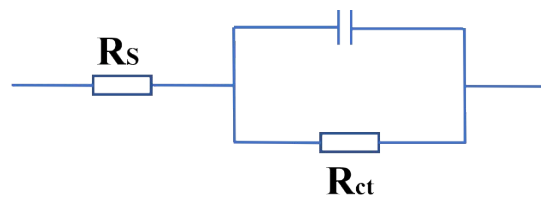

**Figure S10.** equivalent circuit diagram

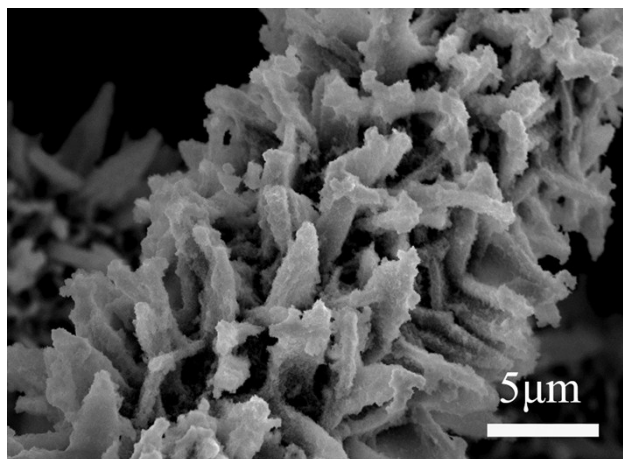

**Figure S11.** SEM image of CC-NC-NiFeP after HER stability test.

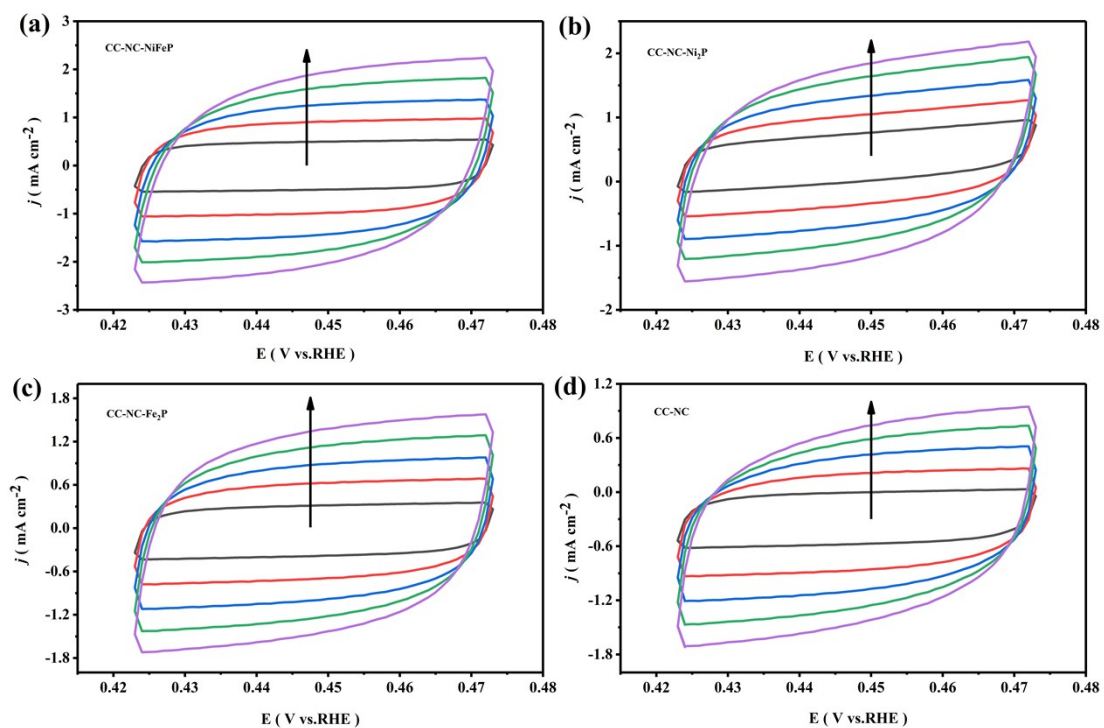

**Figure S12.** CV curves for (a) CC-NC-NiFeP, (b) CC-NC-Ni<sub>2</sub>P and (c) CC-NC-Fe<sub>2</sub>P and (d) CC-NC.

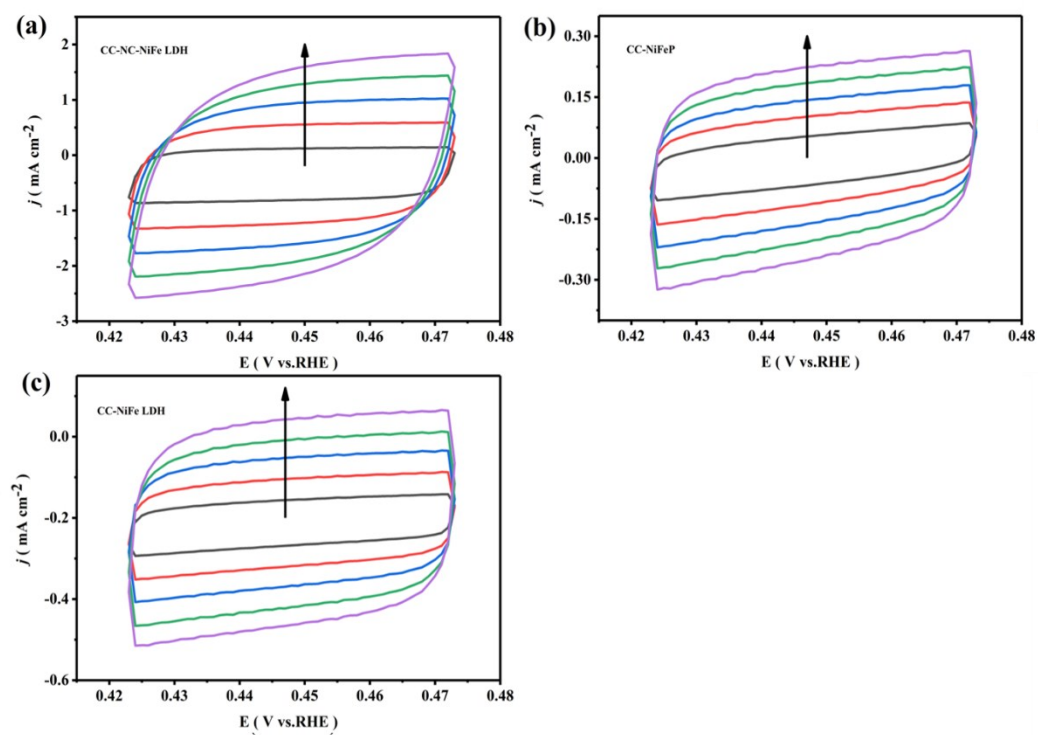

**Figure S13.** (a-c) CV curves for CC-NC-NiFe LDH, CC-NiFeP and CC-NiFe LDH.

Table S2 A compaprison of the OER performance of CC-NC-NiFeP in 1M KOH with non-precious metal catalyst in recent reports

| Catalyst                                                            | $\eta$ (mV) at<br>$J = 10 \text{ mA cm}^{-2}$ | Tafel solpe<br>( $\text{mV dec}^{-1}$ ) | Loading<br>( $\text{mg cm}^{-2}$ ) | Reference |
|---------------------------------------------------------------------|-----------------------------------------------|-----------------------------------------|------------------------------------|-----------|
| CC-NC-NiFeP                                                         | 145<br>$J_{100}=270$                          | 67                                      | 2.67                               | This work |
| Ni/Mo <sub>2</sub> C <sub>(1:2)</sub> -NCNFs                        | 288                                           | 78.4                                    | 0.8                                | R1        |
| Ni <sub>3</sub> ZnCo <sub>0.7</sub> /NCNT-700                       | 380                                           | 89                                      | 1.5                                | R2        |
| NiCo <sub>2</sub> S <sub>4</sub> & NiCo <sub>2</sub> S <sub>4</sub> | 280                                           | 86.8                                    | -                                  | R3        |
| NiCo <sub>2</sub> S <sub>4</sub>                                    | 243                                           | 54.9                                    | 2.07                               | R4        |
| CoP-Co <sub>2</sub> P@PC/PG                                         | $J_{20}=272$                                  | 66                                      | -                                  | R5        |
| Ni-Fe-P/NF30                                                        | 229                                           | -                                       | -                                  | R6        |
| Co <sub>0.6</sub> Fe <sub>0.4</sub> P-1.125                         | 298                                           | 48                                      | -                                  | R7        |
| Ni <sub>3</sub> S <sub>2</sub> @MoS <sub>2</sub> /FeOOH             | 234                                           | 49                                      | -                                  | R8        |
| Fe-Co-P/NF                                                          | 250                                           | 49.2                                    | -                                  | R9        |
| Ni <sub>2</sub> P-Ni <sub>3</sub> S <sub>2</sub> HNAs/NF            | 210                                           | 62                                      | -                                  | R10       |
| NiFe LDH@NiCoP/Nl                                                   | 220                                           | 48.6                                    | -                                  | R11       |
| NiFeP/GC                                                            | 218                                           | 44                                      | -                                  | R12       |

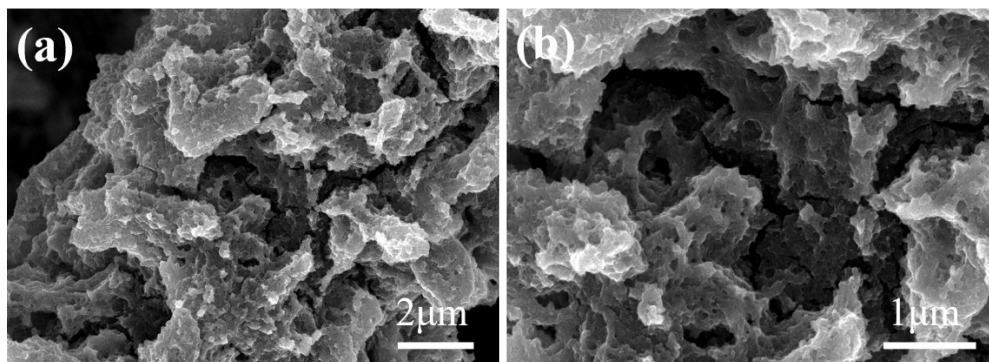

**Figure S14.** SEM images of CC-NC-NiFeP after the OER stability test



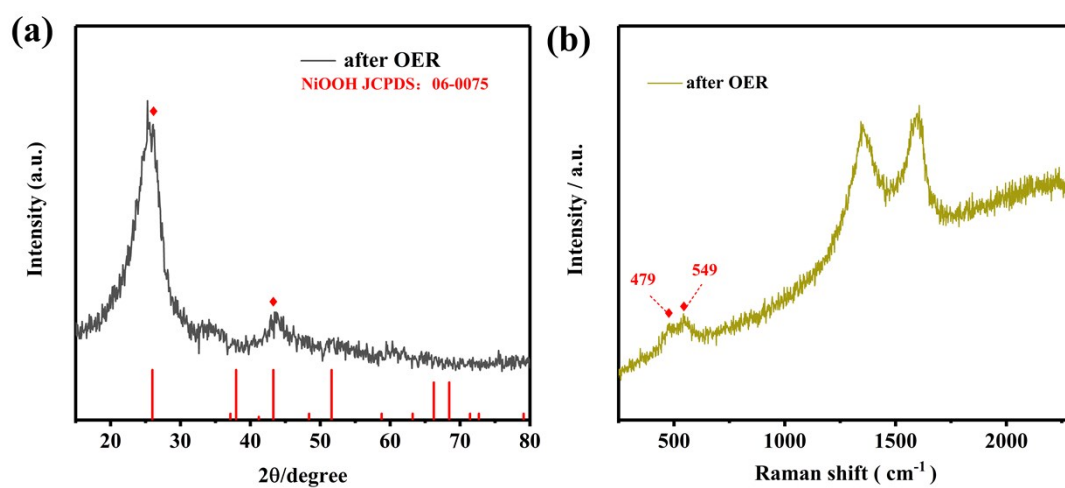

**Figure S15.** (a) XRD and (b) Raman spectrum of CC-NC-NiFeP after OER stability test.

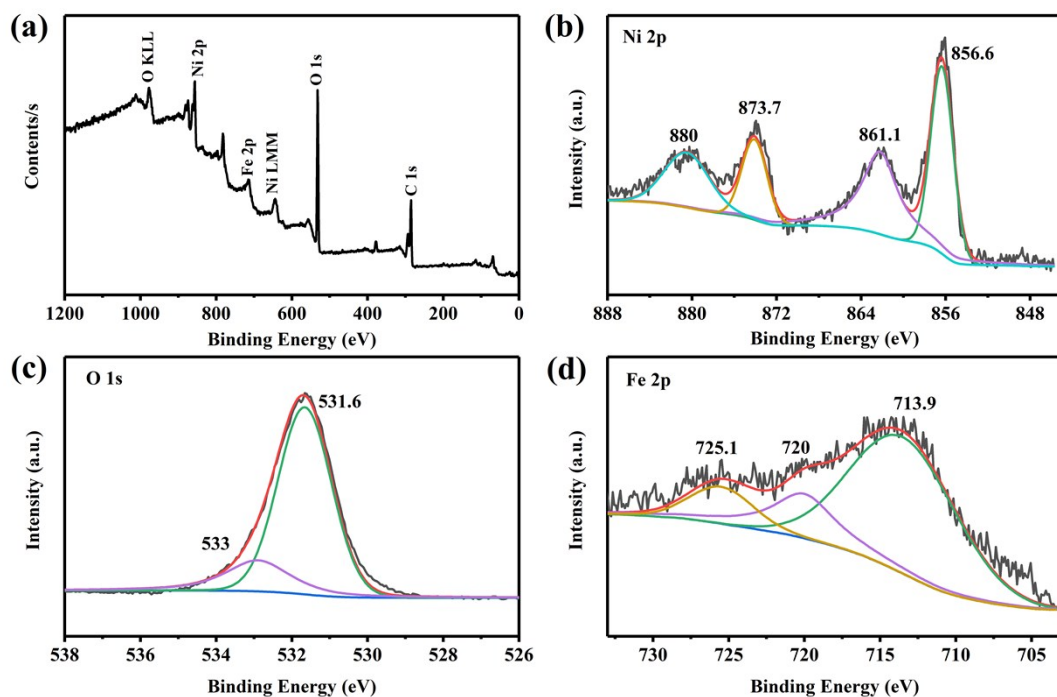

**Figure S16.** (a) Overall XPS spectra of CC-NC-NiFeP after the OER stability test (b-d) High-resolution scans of nickel, iron, and oxygen of CC-NC-NiFeP after OER stability test

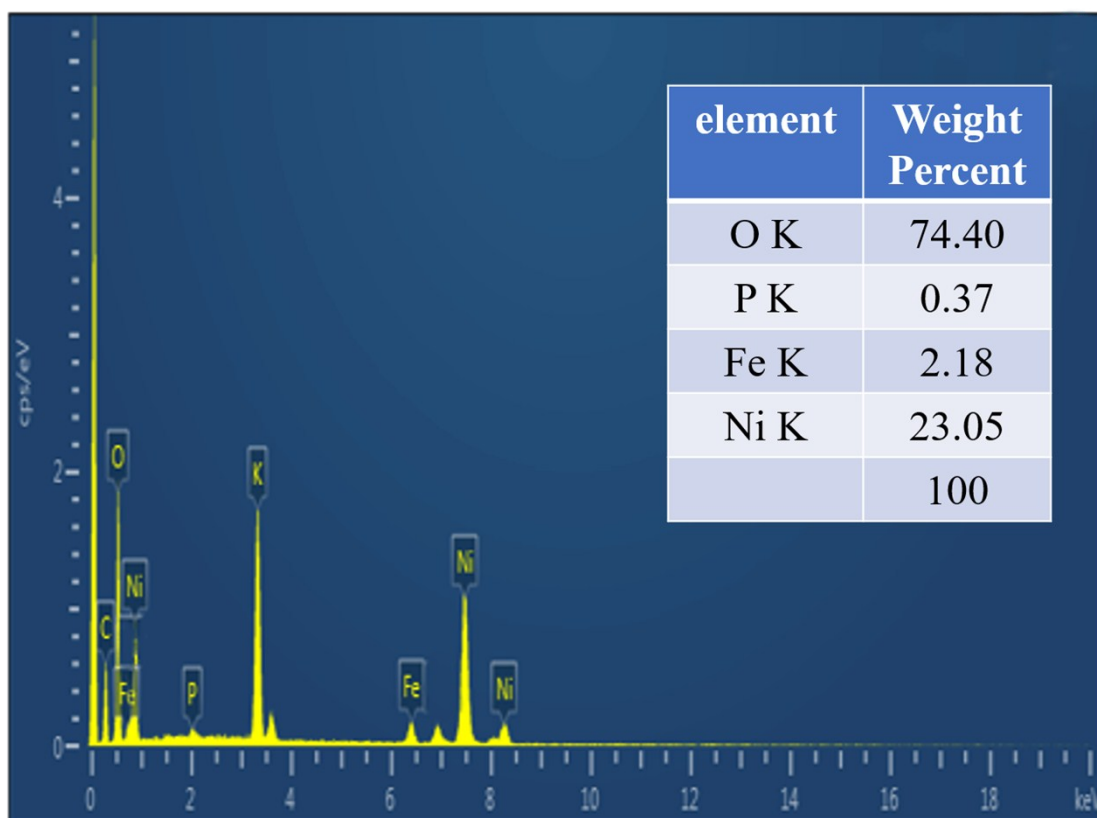

**Figure S17.** The EDX spectra of CC-NC-NiFeP after the OER stability test.

## Computational detail

### Theoretical models

Ni<sub>2</sub>P (201), Fe<sub>2</sub>P (201) and surface oxidized Ni<sub>2</sub>P (201) (denoted as Ni<sub>2</sub>P-O) were modeled by a periodically repeated four-layer slab and a vacuum region of 20 Å was used to separate adjacent slabs. An unit cell in the plane perpendicular to (201) direction were used for Ni<sub>2</sub>P (201), Fe<sub>2</sub>P (201) and Ni<sub>2</sub>P-O as shown in Figure 6 a. For the case of Fe doping for Ni<sub>2</sub>P, totally four Ni atoms are replaced by Fe atoms where one of these substituted Ni atoms are on the surface, the other are in the slab, as displayed in Figure 6 a and Figure S10 b. The crystal structures of these catalysts for both hydrogen evolution reaction and oxygen evolution reactions were optimized. The lattice constants of the slab for Ni<sub>2</sub>P (201), Fe-doped Ni<sub>2</sub>P (201) and their counterparts with partial surface oxidation are 8.95 Å, 5.8751 Å, and 27.5191 Å, and that of Fe<sub>2</sub>P (201) are 8.959 Å, 5.6568 Å, and 27.4129 Å. In all structural relaxation calculations, the bottom two layers of slabs were fixed and the top two layers with adsorbed atoms were allowed to relax.

### Free energy calculation

The free energy of atomic hydrogen adsorption is a widely accepted descriptor of hydrogen evolution reaction activity, which is read

$$\Delta G_H^* = \Delta E(H^*) + \Delta ZPE(H^*) - T\Delta S(H^*)$$

with the hydrogen chemisorption energy

$$\Delta E(H^*) = E_{\text{slab}+H} - (E_{\text{slab}} + \frac{1}{2}E_{H_2})$$

Where  $E_{\text{slab}+H}$  refers to the total energy of slab with a hydrogen atom adsorbed on the surface,  $E_{\text{slab}}$  refers to the total energy of slab with clean surface,  $E_{H_2}$  refers to the energy of H<sub>2</sub> in the gas phase.  $\Delta ZPE(H^*)$  denotes the change of zero point energy of hydrogen between the adsorbed state and the gas phase.  $\Delta S(H^*)$  represents the entropy change of H<sup>\*</sup> adsorption. Since the configuration entropy in the adsorbed state is small

and negligible, we take the entropy of adsorption of  $\frac{1}{2}H_2$  as  $\Delta S(H^*) \approx -\frac{1}{2}S(H_2)$ , where  $S(H_2)$  is the entropy of H<sub>2</sub> in the gas phase at stand conditions. Hence the free energy of atomic hydrogen adsorption can be approximately obtained through  $\Delta G_H^* \approx \Delta E(H^*) + \Delta ZPE(H^*) + 0.205$  eV, due to  $TS(H_2) \approx 0.41$  eV for H<sub>2</sub> at stand conditions.

The overall OER process can be described by the following four electron reaction paths:

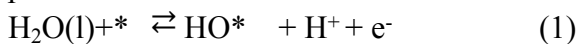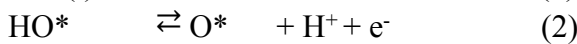

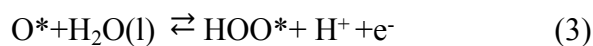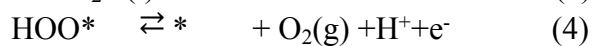

By using the scheme described in the previous study<sup>13</sup>, the Gibbs free energy of each elementary step for OER has been calculated as shown in the main text.

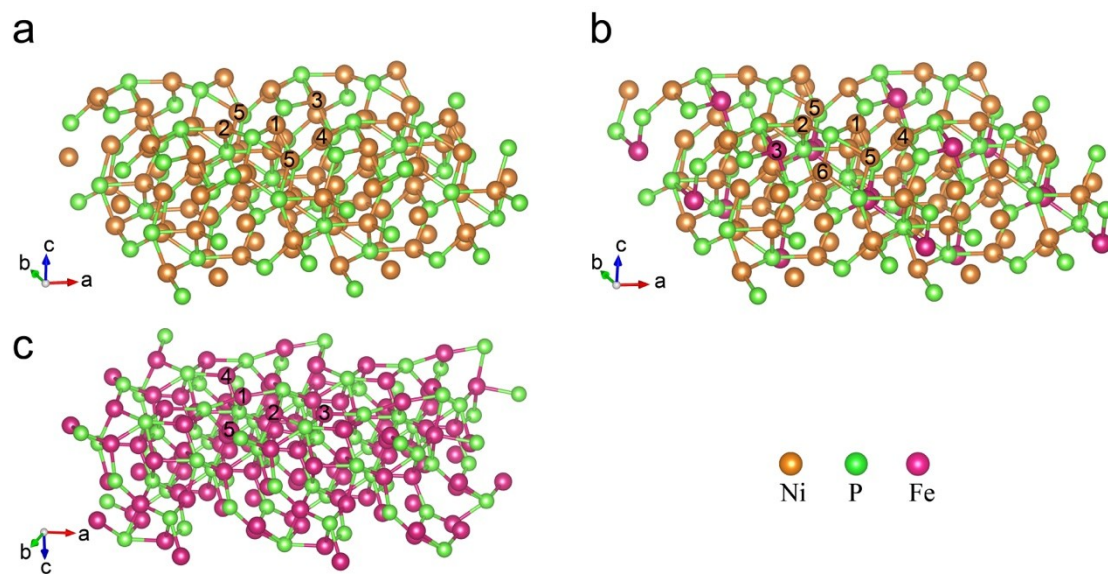

Figure S18 theoretical models used in the work. The crystal structure of (a)  $\text{Ni}_2\text{P}$  (201), (b)  $\text{Ni}_{1.7}\text{Fe}_{0.3}\text{P}$  (201), and (c)  $\text{Fe}_2\text{P}$  (201). The Ni atoms and Fe atoms on the surfaces of these catalysts are labeled by integers.

Table S3. The calculated results of  $\text{H}^*$  absorbed on the surface of  $\text{Ni}_2\text{P}$ ,  $\text{Ni}_{1.7}\text{Fe}_{0.3}\text{P}$ , and  $\text{Fe}_2\text{P}$  in different models.  $\Delta E(\text{H}^*)$  denotes the hydrogen chemisorption energy,  $\text{ZPE}(\text{H}^*)$  the zero point energy,  $\Delta \text{ZPE}$  the zero point change, and  $\Delta G(\text{H}^*)$  the adsorption free energy. While ‘m-H-n’ denotes the bridge active sites between two atoms labeled by ‘m’ and ‘n’, ‘Hollow’ represents the hollow active sites on the top of the center of the triangular formed by nearest-neighbor Ni or Fe atoms labeled 1, 2, and 5 on the surface. The corresponding theoretical models are shown in Fig. S18.

| models                                   | adsorption site | $\Delta E(H^*)/\text{eV}$ | $\text{ZPE}(H^*)/\text{eV}$ | $\Delta \text{ZPE}/\text{eV}$ | $\Delta G(H^*)/\text{eV}$ |
|------------------------------------------|-----------------|---------------------------|-----------------------------|-------------------------------|---------------------------|
| $\text{Ni}_2\text{P}$                    | 1-H-4           | -0.391                    | 0.190                       | 0.052                         | -0.134                    |
| $\text{Ni}_2\text{P}$                    | Hollow          | -0.219                    | 0.171                       | 0.034                         | 0.020                     |
| $\text{Ni}_2\text{P}$                    | 3               | 0.100                     | 0.186                       | 0.048                         | 0.354                     |
| $\text{Fe}_2\text{P}$                    | 1-H-4           | -0.809                    | 0.184                       | 0.047                         | -0.558                    |
| $\text{Fe}_2\text{P}$                    | Hollow          | -0.737                    | 0.187                       | 0.050                         | -0.482                    |
| $\text{Fe}_2\text{P}$                    | 3               | -0.071                    | 0.177                       | 0.040                         | 0.174                     |
| $\text{Ni}_{1.6}\text{Fe}_{0.4}\text{P}$ | 1-H-4           | -0.426                    | 0.190                       | 0.053                         | -0.169                    |
| $\text{Ni}_{1.6}\text{Fe}_{0.4}\text{P}$ | 3-H-6           | -0.256                    | 0.183                       | 0.046                         | -0.006                    |
| $\text{Ni}_{1.6}\text{Fe}_{0.4}\text{P}$ | Hollow          | -0.435                    | 0.161                       | 0.024                         | -0.206                    |

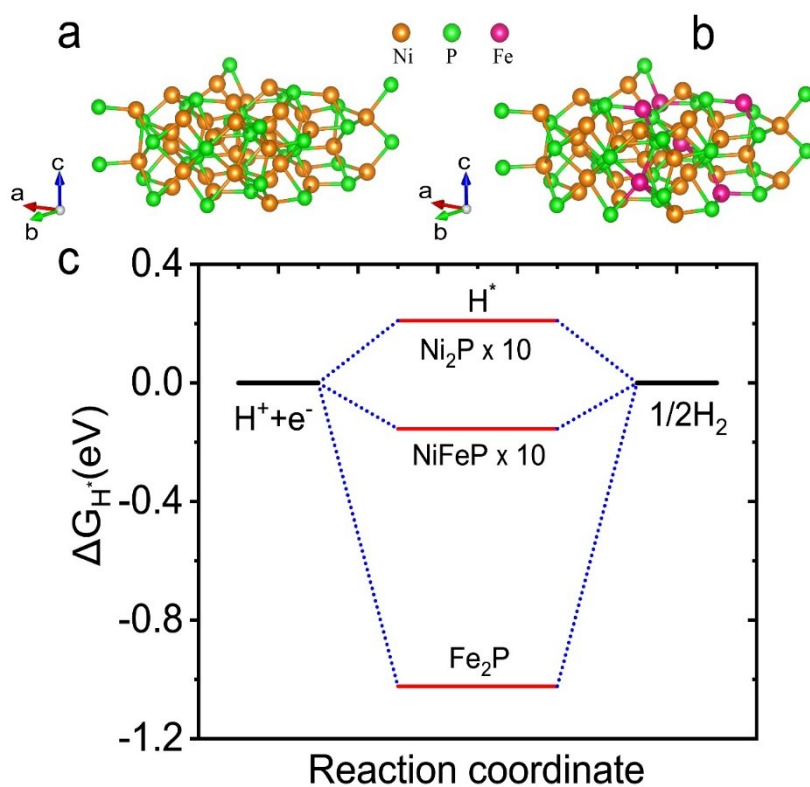

Figure S19. Theoretical models and the free-energy diagram of hydrogen evolution reaction. Crystal structure of (a)  $\text{Ni}_2\text{P}$  (001) and (b)  $\text{Ni}_{1.7}\text{Fe}_{0.3}\text{P}$  (001); (c) Free-energy diagram of hydrogen evolution reaction over  $\text{Ni}_2\text{P}$  (001),  $\text{Ni}_{1.7}\text{Fe}_{0.3}\text{P}$  (001) and  $\text{Fe}_2\text{P}$  (001).

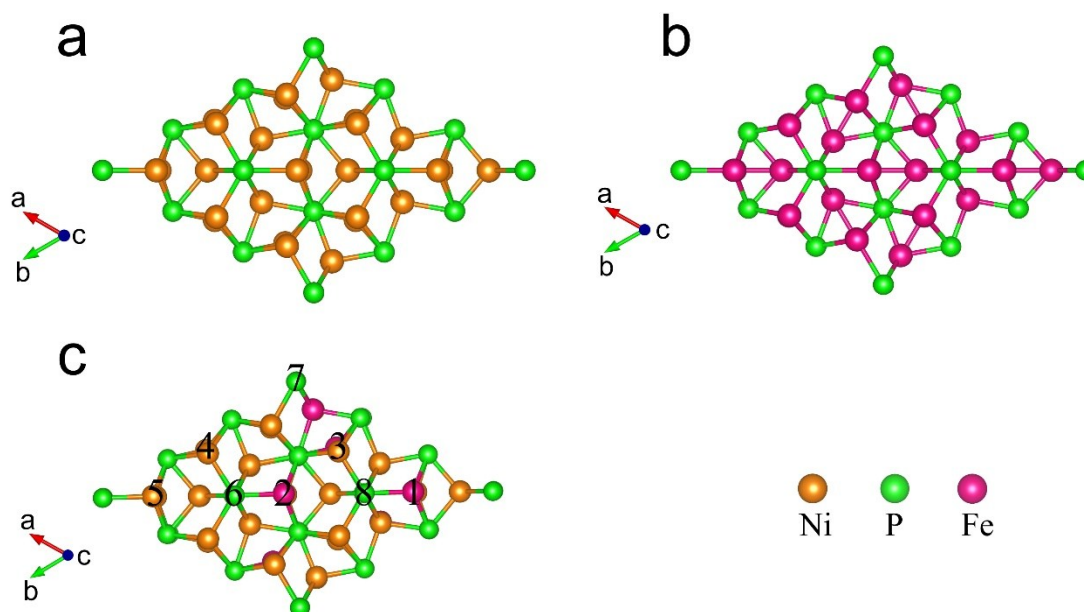

Figure S20 theoretical models used in the work. (a)  $\text{Ni}_2\text{P}$  (001), (b)  $\text{Fe}_2\text{P}$  (001), and (c) the crystal structures of  $\text{Ni}_{1.7}\text{Fe}_{0.3}\text{P}$  (001) for which the partial Ni atoms on the surface are labeled 3, 4, and 5, and the Fe atoms on the surface are labeled 1 and 2, and the partial P atoms on the surface are labeled 6, 7, and 8.

Table S4. The calculated results of  $\text{H}^*$  absorbed on the surface of  $\text{Fe}_2\text{P}$ ,  $\text{Ni}_{1.7}\text{Fe}_{0.3}\text{P}$ , and  $\text{Ni}_2\text{P}$  in different models.  $\Delta E(\text{H}^*)$  denotes the hydrogen chemisorption energy,  $\text{ZPE}(\text{H}^*)$  the zero point energy,  $\Delta \text{ZPE}$  the zero point change, and  $\Delta G(\text{H}^*)$  the adsorption free energy. While ‘m-H-n’ denotes the bridge active sites between two atoms labeled by ‘m’ and ‘n’, ‘Hollow’ represents the hollow active sites on the top of the center of the triangular formed by nearest-neighbor Ni atoms on the surface. The corresponding theoretical models are shown in Fig. S20.

| models                                   | adsorption site | $\Delta E(\text{H}^*)/\text{eV}$ | $\text{ZPE}(\text{H}^*)/\text{eV}$ | $\Delta \text{ZPE}/\text{eV}$ | $\Delta G(\text{H}^*)/\text{eV}$ |
|------------------------------------------|-----------------|----------------------------------|------------------------------------|-------------------------------|----------------------------------|
| $\text{Fe}_2\text{P}$                    | Hollow          | -1.261                           | 0.170                              | 0.032                         | -1.023                           |
| $\text{Ni}_2\text{P}$                    | Hollow          | -0.192                           | 0.145                              | 0.008                         | 0.021                            |
| $\text{Ni}_{1.7}\text{Fe}_{0.3}\text{P}$ | 4-H-5           | -0.252                           | 0.169                              | 0.032                         | -0.015                           |
| $\text{Ni}_{1.7}\text{Fe}_{0.3}\text{P}$ | 3               | -0.514                           | 0.174                              | 0.036                         | -0.273                           |
| $\text{Ni}_{1.7}\text{Fe}_{0.3}\text{P}$ | 4               | -0.505                           | 0.171                              | 0.033                         | -0.267                           |
| $\text{Ni}_{1.7}\text{Fe}_{0.3}\text{P}$ | 6               | 0.207                            | 0.180                              | 0.042                         | 0.454                            |
| $\text{Ni}_{1.7}\text{Fe}_{0.3}\text{P}$ | 7               | 0.076                            | 0.189                              | 0.052                         | 0.333                            |
| $\text{Ni}_{1.7}\text{Fe}_{0.3}\text{P}$ | 8               | 0.272                            | 0.176                              | 0.039                         | 0.516                            |

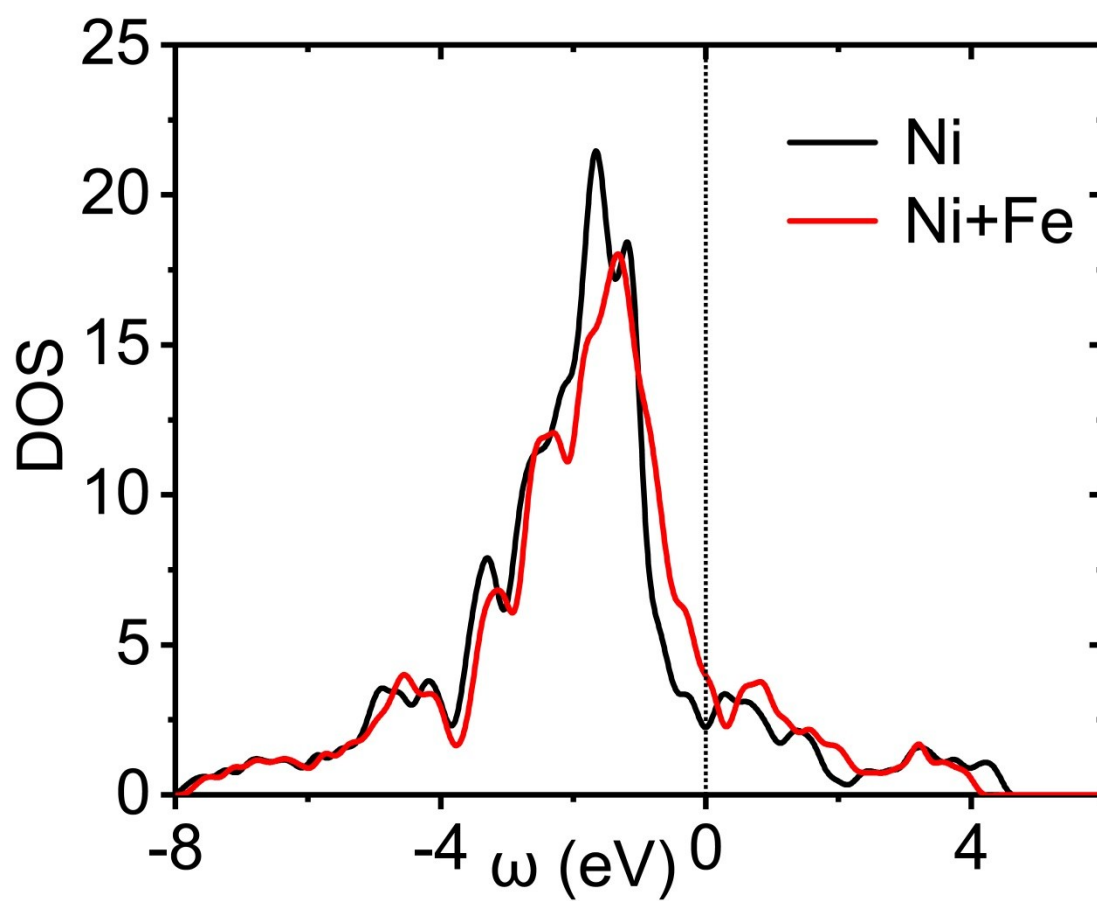

Figure S21 Total and projected density of states of  $\text{Ni}_2\text{P}$  and Fe-doped  $\text{Ni}_2\text{P}$ .



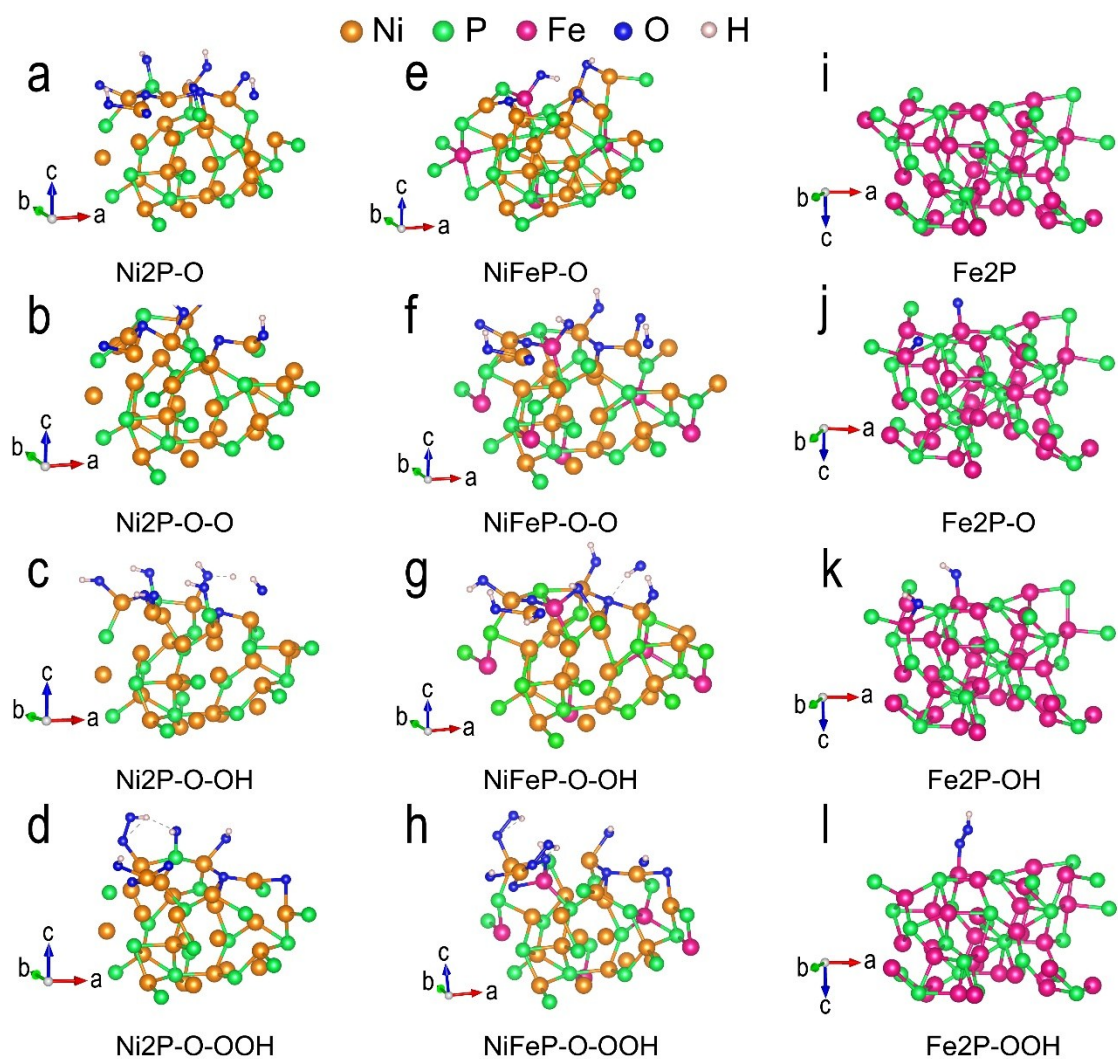

Figure S22 View of adsorption of intermediates on catalyst surfaces in four elemental steps during OER. (a-d) Ni<sub>2</sub>P (201) with partial surface oxidation, (e-h) Ni<sub>1.7</sub>Fe<sub>0.3</sub>P (201) with partial surface oxidation, and (i-l) Fe<sub>2</sub>P (201).

## References

1. M. Li, Y. Zhu, H. Wang, C. Wang, N. Pinna, and X. Lu, *Adv. Energy. Mater.*, 2019, **9**, 1803185.
2. R. Li, X. Li, D. Yu, L. Li, G. Yang, K. Zhang, S. Ramakrishna, L. Xie, and S. Peng, *Carbon*, 2019, **148**, 496
3. F. Li, R. Xu, Y. Li, F. Liang, D. Zhang, W.-F. Fu, and X.-J. Lv, *Carbon*, 2019, **145**, 521.
4. Z. Kang, H. Guo, J. Wu, X. Sun, Z. Zhang, Q. Liao, S. Zhang, H. Si, P. Wu, L. Wang, and Y. Zhang, *Adv. Funct. Mater.*, 2019, **29**, 1807031.
5. J. Yang, D. Guo, S. Zhao, Y. Lin, R. Yang, D. Xu, N. Shi, X. Zhang, L. Lu, Y. Q. Lan, J. Bao, and M. Han, *Small*, 2019, **15**, 1804546.
6. K. Wang, K. Sun, T. Yu, X. Liu, G. Wang, L. Jiang, and G. Xie, *J. Mater. Chem. A*, 2019, **7**, 2518.
7. Y. Lian, H. Sun, X. Wang, P. Qi, Q. Mu, Y. Chen, J. Ye, X. Zhao, Z. Deng, and Y. Peng, *Chem. Sci*, 2019, **10**, 464.
8. M. Zheng, K. Guo, W.-J. Jiang, T. Tang, X. Wang, P. Zhou, J. Du, Y. Zhao, C. Xu, and J.-S. Hu, *Appl. Catal. B: Environ.*, 2019, **244**, 1004.
9. K. Sun, K. Wang, T. Yu, X. Liu, G. Wang, L. Jiang, Y. Bu, and G. Xie, *Int. J. Hydrogen Energy*, 2019, **44**, 1328.
10. L.Y. Zeng, K. Sun, X.B. Wang, Y.Q. Liu, Y. Pan, Z. Liu, D.W. Cao, Y. Song, S.H. Liu, C.G. Liu, *Nano Energy*, 2018, **51**, 26.
11. H. Zhang, X. Li, A. Hähnel, V. Naumann, C. Lin, S. Azimi, S. L. Schweizer, A. W. Maijenburg, and R. B. Wehrspohn, *Adv. Func. Mater.*, 2018, **28**, 1706847 .
12. R.-Q. Li, B.-L. Wang, T. Gao, R. Zhang, C. Xu, X. Jiang, J. Zeng, Y. Bando, P. Hu, Y. Li, and X.-B. Wang, *Nano Energy*, 2019, **58**, 870.
13. I. C. Man, H. Y. Su, F. Calle-Vallejo, H. A. Hansen, J. I. Martínez, N. G. Inoglu, J. Kitchin, T. F. Jaramillo, J. K. Nørskov, and J. Rossmeisl, *ChemCatChem*, 2011, **3**, 1159.
